# Supplementary material for: Impact of Socioeconomic Inequalities on Dental Caries Status in Sardinian Children
Source: MDPI journal article supplement (doi:10.3390/children11010096), 2024-01-12
Supplement: s1 [file s1]

Table S1. Inhabitants, 3-11 years old population (sorted by gender) of the municipalities involved in the study, with the related IDMS score.

| Municipality            | Inhabitants | 3-11 years old | Females 3-11 years old | Males 3-11 years old | IDMS |
|-------------------------|-------------|----------------|------------------------|----------------------|------|
| Aaaius                  | 1468        | 87             | 47                     | 40                   | 0.32 |
| Aqlientu                | 1240        | 75             | 36                     | 39                   | 0.59 |
| Alà dei Sardi           | 1837        | 167            | 90                     | 77                   | 0.68 |
| Alghero                 | 42760       | 2660           | 1291                   | 1369                 | 0.23 |
| Anela                   | 620         | 38             | 19                     | 19                   | 0.34 |
| Ardara                  | 766         | 53             | 26                     | 27                   | 0.79 |
| Arzachena               | 13477       | 1102           | 549                    | 553                  | 0.21 |
| Badesi                  | 1850        | 120            | 53                     | 67                   | 0.55 |
| Banari                  | 528         | 31             | 20                     | 11                   | 0.58 |
| Benetutti               | 1809        | 112            | 61                     | 51                   | 0.59 |
| Berchidda               | 2689        | 169            | 72                     | 97                   | 0.57 |
| Bessude                 | 411         | 17             | 9                      | 8                    | 0.45 |
| Bonnanaro               | 950         | 42             | 27                     | 15                   | 0.59 |
| Bono                    | 3481        | 264            | 140                    | 124                  | 0.2  |
| Bonorva                 | 3323        | 177            | 71                     | 106                  | 0.28 |
| Bortigiadas             | 752         | 54             | 25                     | 29                   | 0.45 |
| Borutta                 | 279         | 13             | 6                      | 7                    | 0.92 |
| Bottidda                | 673         | 45             | 13                     | 32                   | 0.42 |
| Buddusò                 | 3799        | 388            | 171                    | 217                  | 0.37 |
| Budoni                  | 5156        | 348            | 173                    | 175                  | 0.21 |
| Bultei                  | 897         | 43             | 20                     | 23                   | 0.36 |
| Bulzi                   | 492         | 23             | 8                      | 15                   | 0.55 |
| Burqos                  | 899         | 67             | 22                     | 45                   | 0.43 |
| Calangianus             | 4057        | 229            | 117                    | 112                  | 0.2  |
| Carqeqhe                | 626         | 60             | 30                     | 30                   | 0.52 |
| Castelsardo             | 5890        | 413            | 180                    | 233                  | 0.28 |
| Cheremule               | 428         | 24             | 9                      | 15                   | 0.54 |
| Chiaramonti             | 1619        | 102            | 61                     | 41                   | 0.59 |
| Codrongianos            | 1311        | 43             | 91                     | -48                  | 0.34 |
| Cossoine                | 818         | 41             | 19                     | 22                   | 0.46 |
| Erula                   | 729         | 33             | 10                     | 23                   | 0.56 |
| Esporlatu               | 382         | 26             | 10                     | 16                   | 0.55 |
| Florinas                | 1509        | 104            | 52                     | 52                   | 0.41 |
| Giave                   | 512         | 16             | 26                     | -10                  | 0.67 |
| Golfo Aranci            | 2471        | 174            | 87                     | 87                   | 0.6  |
| Illorai                 | 830         | 46             | 25                     | 21                   | 0.37 |
| Ittireddu               | 483         | 21             | 13                     | 8                    | 0.74 |
| Ittiri                  | 8511        | 633            | 311                    | 322                  | 0.21 |
| La Maddalena            | 10961       | 745            | 341                    | 404                  | 0.18 |
| Laerru                  | 891         | 45             | 19                     | 26                   | 0.63 |
| Loiri Porto San Paolo   | 3535        | 285            | 151                    | 134                  | 0.47 |
| Luoqosanto              | 1839        | 152            | 75                     | 77                   | 0.5  |
| Luras                   | 2491        | 181            | 95                     | 86                   | 0.55 |
| Mara                    | 586         | 25             | 8                      | 17                   | 0.53 |
| Martis                  | 488         | 22             | 10                     | 12                   | 0.6  |
| Monteleone Rocca Doria  | 107         | 6              | 3                      | 3                    | 0.66 |
| Monti                   | 2402        | 200            | 99                     | 101                  | 0.5  |
| Mores                   | 1912        | 133            | 60                     | 73                   | 0.54 |
| Muros                   | 854         | 79             | 41                     | 38                   | 0.68 |
| Nuqhedu San Nicolò      | 788         | 42             | 23                     | 19                   | 0.43 |
| Nule                    | 1365        | 91             | 38                     | 53                   | 0.63 |
| Nulvi                   | 2718        | 197            | 107                    | 90                   | 0.57 |
| Olbia                   | 59599       | 5407           | 2633                   | 2774                 | 0.2  |
| Olmedo                  | 4191        | 351            | 160                    | 191                  | 0.39 |
| Oschiri                 | 3225        | 199            | 92                     | 107                  | 0.5  |
| Osilo                   | 2951        | 148            | 75                     | 73                   | 0.55 |
| Ossi                    | 5724        | 411            | 205                    | 206                  | 0.4  |
| Ozieri                  | 10555       | 734            | 354                    | 380                  | 0.15 |
| Padria                  | 636         | 31             | 16                     | 15                   | 0.52 |
| Padru                   | 2080        | 149            | 66                     | 83                   | 0.65 |
| Palau                   | 4135        | 333            | 153                    | 180                  | 0.19 |
| Pattada                 | 2999        | 216            | 110                    | 106                  | 0.56 |
| Perfugas                | 2331        | 160            | 77                     | 83                   | 0.27 |
| Ploaqhe                 | 4464        | 339            | 175                    | 164                  | 0.57 |
| Porto Torres            | 21891       | 1701           | 837                    | 864                  | 0.08 |
| Pozzomaggiore           | 2568        | 146            | 73                     | 73                   | 0.19 |
| Putifigari              | 722         | 62             | 32                     | 30                   | 0.61 |
| Romana                  | 538         | 38             | 23                     | 15                   | 0.56 |
| San Teodoro             | 4951        | 337            | 164                    | 173                  | 0.66 |
| Santa Maria Coquinas    | 1370        | 76             | 35                     | 41                   | 0.5  |
| Santa Teresa di Gallura | 5304        | 321            | 152                    | 169                  | 0.16 |
| Sant'Antonio di Gallura | 1498        | 96             | 44                     | 52                   | 0.44 |
| Sassari                 | 125998      | 8726           | 4181                   | 4545                 | 0.14 |
| Sedini                  | 1334        | 80             | 36                     | 44                   | 0.39 |
| Semestene               | 143         | 4              | 4                      | 0                    | 0.85 |

|                                   |               |              |              |              |      |
|-----------------------------------|---------------|--------------|--------------|--------------|------|
| <i>Sennori</i>                    | 7136          | 521          | 252          | 269          | 0.44 |
| <i>Siliqo</i>                     | 843           | 46           | 24           | 22           | 0.52 |
| <i>Sorso</i>                      | 14517         | 1114         | 543          | 571          | 0.38 |
| <i>Stintino</i>                   | 1559          | 84           | 39           | 45           | 0.58 |
| <i>Telti</i>                      | 2295          | 203          | 96           | 107          | 0.65 |
| <i>Tempio Pausania</i>            | 13726         | 916          | 405          | 511          | 0.18 |
| <i>Terqu</i>                      | 608           | 32           | 15           | 17           | 0.54 |
| <i>Thiesi</i>                     | 2874          | 201          | 101          | 100          | 0.16 |
| <i>Tissi</i>                      | 2408          | 213          | 101          | 112          | 0.43 |
| <i>Torralba</i>                   | 946           | 62           | 36           | 26           | 0.51 |
| <i>Trinità d'Agultu e Vignola</i> | 2315          | 127          | 68           | 59           | 0.62 |
| <i>Tula</i>                       | 1514          | 118          | 54           | 64           | 0.74 |
| <i>Uri</i>                        | 2910          | 209          | 90           | 119          | 0.45 |
| <i>Usini</i>                      | 4314          | 370          | 194          | 176          | 0.39 |
| <i>Valledoria</i>                 | 4326          | 278          | 126          | 152          | 0.27 |
| <i>Viddalba</i>                   | 1677          | 106          | 50           | 56           | 0.54 |
| <i>Villanova Monteleone</i>       | 2245          | 148          | 77           | 71           | 0.6  |
| <b>Total</b>                      | <b>486689</b> | <b>35076</b> | <b>17028</b> | <b>18048</b> |      |
